# Supplementary material for: Purification of double-walled carbon nanotube macro-films
Source: Royal Society of Chemistry journal article supplement (doi:10.1039/c1nj20866g), 2011-12-06
Supplement: c1nj20866g.pdf [file c1nj20866g.pdf]

## Electronic Supplementary Information

### 1. Crystal size of the residual catalyst in the pristine carbon nanotube film

The average crystal size is about 8 nm.

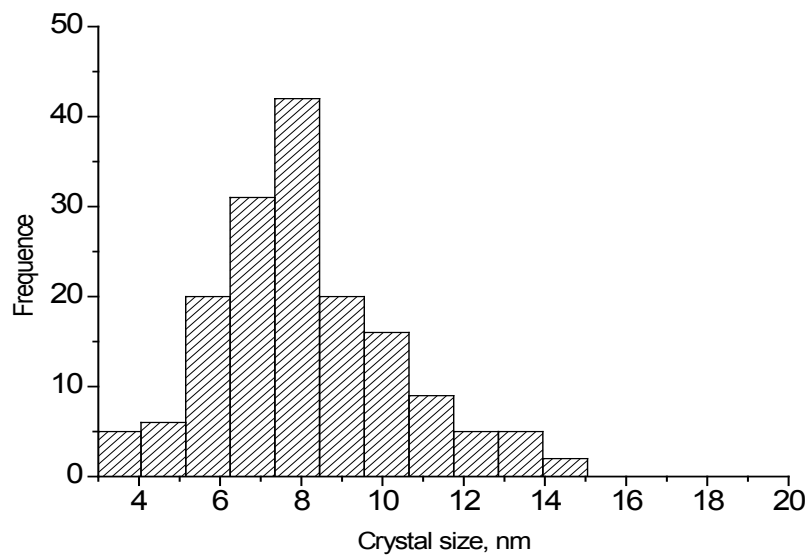

Fig. S1. Crystal size of the residual catalyst.

## 2. Purification with $\text{NH}_4\text{Cl}$ at 700 °C in $\text{N}_2$ atmosphere

In order to realize the effect of the oxidation step in purification of DWNTs, we also designed a process in which the raw materials were directly treated by  $\text{NH}_4\text{Cl}$  at 700 °C in  $\text{N}_2$  atmosphere. Fig. S2 shows the TEM images of the sample. Although most metal contents were removed (the residual is as low as 8.6%, see Fig. S3), there were a lot of nanocrystalline graphite cages left. From the TG curve, it is estimated that ~13.33% amorphous carbon left. The DTG curve of the samples also has two peaks in the temperature range of 500 to 700 °C. Obviously, without oxidation process the graphitic cage is hard to be removed.

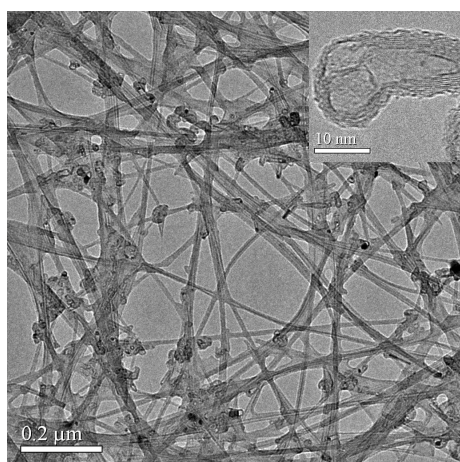

Fig. S2. TEM image of the CNTs purified with  $\text{NH}_4\text{Cl}$ . The inserted image is the morphology of a graphitic carbon nanocage.

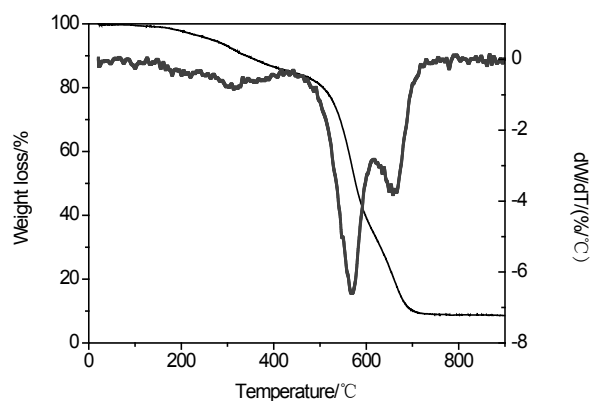

Fig. S3. TGA curves of the CNTs purified with  $\text{NH}_4\text{Cl}$ .
